# Supplementary material
Source: PubMed Central journal article supplement (PMC2575149)

## E07-12-1266 Seiler

**Supplementary Table 1.** Primers used in this study

| Name       | Sequence                                                                                                  |
|------------|-----------------------------------------------------------------------------------------------------------|
| NV_myc1    | 5'-CGG AAT TCC GGC TGG GGC AGG CCA AAC AAT GGG GTG ACT ACT GGC ACT GCA TCT TCT AGA GGT GAA CAA AAG TTG-3' |
| NV_myc2    | 5'-TCC CCG CGG CTA CCC GTC AGA TCT GTT CAA G-3'                                                           |
| NV_myc3    | 5'-GGG CCC GGA TGG CCA TCC CGT CAG ATC TGT TCA AG-3'                                                      |
| NV_myc4    | 5'-GGG CCC CCA TGG GAT CTT CTA GAG GTG AAC AAA AGG GGC CCC CAT GGG ATC TTC TAG AGG TGA ACA AAA G-3'       |
| NV_Gap1    | 5'-CGC GAT ATC ATG GCT CCA ATG GTG GAA GG-3'                                                              |
| NV_Gap2    | 5'-CGC GAA TTC TCA CGT CCC GGG CCC CAC GC-3'                                                              |
| Hyg5'XbaI  | 5'-AGG TCT AGA GTC GGT GAG TTC CTT TC-3'                                                                  |
| Hyg3'XbaI  | 5'-ACC TCT AGA CAA GTG TAC CTG TGC ATT C-3'                                                               |
| Hyg5'ApaI  | 5'-AAT GGG CCC TGA CAC AGC TCA ATA AGG CTA GCC-3'                                                         |
| Hyg3'ApaI  | 5'-TTT GGG CCC TGA GCG TAT TGG GTG TTA CGG AGC-3'                                                         |
| NV_Rho1_2  | 5'-CAA GCG GCC GCT CTG CTG AAC TCC GCC GAA AG-3'                                                          |
| NV_Rho2_2  | 5'-CAA GCG GCC GCG CAT CAG GCA GCC CTC AGA ATG-3'                                                         |
| NV_Rho3_2  | 5'-CAA GCG GCC GCC CTT GCG GAC TCG GAG GGT C-3'                                                           |
| NV_Rho4_2  | 5'-CAA GCG GCC GCA CCG AGG GCC CGG CCT AC-3'                                                              |
| NV_Rho4_3  | 5'-CAA GCG GCC GCC TCA CAT CAT ACC ACA CTT TC-3'                                                          |
| NV_Rho3_3  | 5'-CAA GCG GCC GCT TAC ATG ACC ACG CAC TTC G-3'                                                           |
| NV_Rho2_3  | 5'-CAA GCG GCC GCT CAT AGA ATC ACA CAG CAC CC-3'                                                          |
| NV_Rho1_3  | 5'-CTT GCG GCC GCT TAG ACC GAG CTC TTG CAG AGG-3'                                                         |
| NV_nat1    | 5'-ACC CCA TGG CCA TGA CCA CTC TTG ACG AC-3'                                                              |
| NV_nat2    | 5'-AGG GAA TTC TCA GGG GCA GGG CAT GC-3'                                                                  |
| NV_nat3    | 5'-ACT CTT GAC GAC ACG GCT TAC-3'                                                                         |
| NV_nat4    | 5'-TAC GCG TGG ATC GCC GGT G--3'                                                                          |
| NV_nat5    | 5'-CCA AAA CAA TAT GGT AGG TGA GGT AGG AGC TCA TGC AGT GCT CAG GGG CAG GGC ATG C-3'                       |
| NV_gpd1    | 5'-GGG TTT CGA ACT ACA TCA AGG GTC CAA GAC CGA CAT CGA GGC TCT GTA CAG TGA CCG GTG-3'                     |
| NV_KOlr3f  | 5'-GCG AGC GGC AGG CGC TCT ACA TGA GCA TGC CCT GCC CCT GAG CAC TGC ATG AGC TCC TAC-3'                     |
| NV_KOlr3r  | 5'-GGA ATT GTG AGC GGA TAA CAA TTT CAC ACA GGA AAC AGC CAC CTG GCT CGA CTA AAA CTG-3'                     |
| NV_KOlr5r  | 5'-CTC CGC ATG CCA GAA AGA GTC ACC GGT CAC TGT ACA GAG CCT CGA TGT CGG TCT TGG ACC-3'                     |
| NV_KOlr5f  | 5'-TAA GTT GCG TAA CGC CAG GGT TTT CCC AGT CAC GAC GCA TCG AAT TTG GAA AAT TGG GAC-3'                     |
| NV_KOlr5f2 | 5'-CAT CGA ATT TGG AAA ATT GGG AC-3'                                                                      |
| NV_KOlr3r2 | 5'-CCA CCT GGC TCG ACT AAA ACT G-3'                                                                       |
| NV_Rho2_4  | 5'-CAA CCA TGG GCG GCC GCG CAT CAG GCA GCC CTC AG-3'                                                      |
| NV_Rho2_5  | 5'-CAA CTC GAG CGG CCG CTC ATA GAA TCA CAC AGC AC-3'                                                      |
| NV_GFP2    | 5'-TTT GAT ATC TGT ACA GCT CGT CCA TGC CGA G-3'                                                           |
| NV_GFP1    | 5'-CCC GAT ATC TGA GCA AGG GCG AGG AGC TG-3'                                                              |

NV\_LIM1mut\_f 5'-GAT GGG ACC TTT CAT TTG GAT TCA TTC AAG AGT CGC GTG AGT GCC TG-3'  
 NV\_LIM1mut\_r 5'-CAG GCA CTC ACG CGA CTC TTG AAT GAA TCC AAA TGA AAG GTC CCA TC-3'  
 NV\_LIM2mut\_f 5'-CGC AAA TAC CAC GTC GAC GTC TTT ACC AGC TCG CTT TGC CCG ACT GTC-3'  
 NV\_LIM2mut\_r 5'-GAC AGT CGG GCA AAG CGA GCT GGT AAA GAC GTC GAC GTG GTA TTT GCG-3'  
 NV\_LIM3mut\_f 5'-GAC AAG AGG TGG CAT ATC ACG TCT GTC AAC TCC TCA CGT TGC CAG AAA GAA C-3'  
 NV\_LIM3mut\_r 5'-GTT CTT TCT GGC AAC GTG AGG AGT TGA CAG ACG TGA TAT GCC ACC TCT TGT C-3'  
 NV\_GAPmut\_f 5'-GTT CAG GTG GCT GCC TTG CTA GCA CGA TAC CTC CGA GAG CTG C-3'  
 NV\_GAPmut\_r 5'-GCA GCT CTC GGA GGT ATC GTG CTA GCA AGG CAG CCA CCT GAA C-3'  
 NV\_LIM1mut2\_f 5'-CTA GCG GAC AAG TGC GAG TGC TTA AGA AAG GTG GTG AAC CTT TGA CGG G-3'  
 NV\_LIM1mut2\_r 5'-CCC GTC AAA GGT TCA CCA CCT TTC TTA AGC ACT CGC ACT TGT CCG CTA G-3'  
 NV\_LIM2mut2\_f 5'-CGC AGG TTA GGC CTG CTG AGT TAC CAG GCC GGC GGT GCT CTT CGG GGC-3'  
 NV\_LIM2mut2\_r 5'-GCC CCG AAG AGC ACC GCC GGC CTG GTA ACT CAG CAG GCC TAA CCT GCG-3'  
 NV\_LIM3mut2\_f 5'-GCC TCG GAC TCG GAC TCG GGT ACC CTC TCG AAA AAG CCC ATT GAG GAC GAG-3'  
 NV\_LIM3mut2\_r 5'-CTC GTC CTC AAT GGG CTT TTT CGA GAG GGT ACC CGA GTC CGA GTC CGA GGC-3'  
 NV\_Rho2\_6 5'-CAA GCG GCC GCT CAC CCG CTT CCT TCC TTC TTC-3'  
 SSe\_CDC42\_Sal5 5'-ACG CGT CGA CCG TGA CGG GAA CTA TCA AGT GCG-3'  
 SSe\_CDC42\_Not3 5'-GAT GCG GCC GCT CAC AGA ATC AAG CAC TTC TTG TCC-3'  
 SSe\_Rac\_Sal5 5'-ACG CGT CGA CCG CTG CTA TCG GAG GCG TGC AGT C-3'  
 SSe\_Rac\_Not3 5'-GAT GCG GCC GCT TAG AGG ATA GTG CAC TTG GAC TTC-3'  
 Rho1\_DN1 5'-GTC TAC GTC CCT ACC GTT TTC ATT AAT TAC GTC GCC GAT GT-3'  
 Rho1\_DN2 5'-AAC CTC GAC ATC GGC GAC GTA ATT AAT GAA AAC GGT AGG GA-3'  
 Rho1\_GV1 5'-CGT CAT CGT TGG CGA CGT CGC CTG CGG CAA GAC C-3'  
 Rho1\_GV2 5'-GGT CTT GCC GCA GGC GAC GTC GCC AAC GAT GAC G-3'  
 NV\_lrg14 5'-CCC CTC GAG GTC CGG GCC TGG TTC AGG C-3'  
 NV\_lrg18 5'-AGC GGC CGC TCA TAA TTC ATC GGG AAC CAA ACA CAT CTC TTC AAT ATT TGC-3'  
 NV\_LRG20 5'-CTT TCG GTT GAA GGC GTC TTC CTT AAG AAC GGC AAT ATC AAG AAG C-3'  
 NV\_LRG21 5'-GCT TCT TGA TAT TGC CGT TCT TAA GGA AGA CGC CTT CAA CCG AAA G-3'

**Supplementary Figure 1. (A)** The growth defect of *lrg-1(12-20)* at restrictive conditions is suppressed by osmotic stabilizers. Bar 200  $\mu$ m. **(B)** The hyphal morphology of *lrg-1(12-20)* is not affected by the  $\beta$ 1,3 glucan synthase inhibitor caspofungin at semipermissive conditions. Bar 40 $\mu$ m.

**A**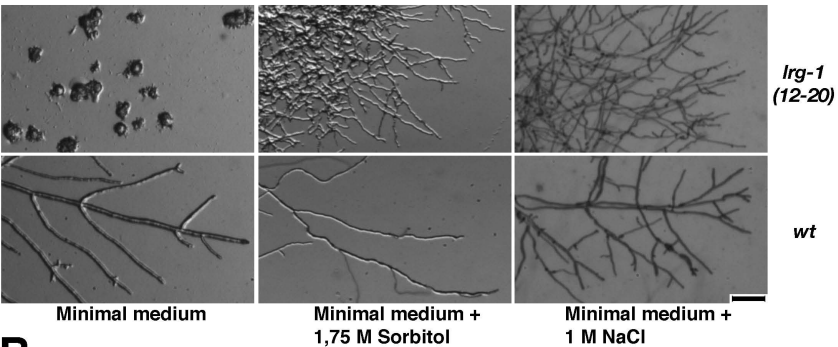**B**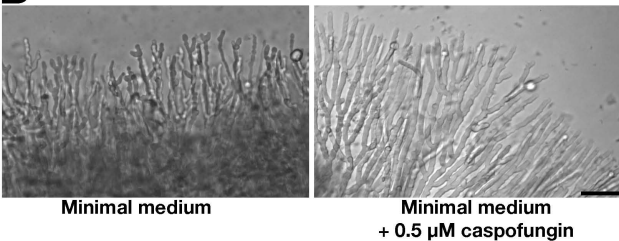

Supplement: E07-12-1266_1.pdf [file E07-12-1266_1.pdf]
